# Supplementary material
Source: PubMed Central journal article supplement (PMC423258)

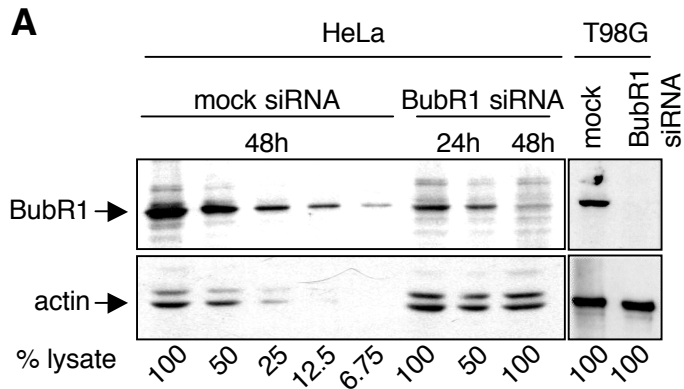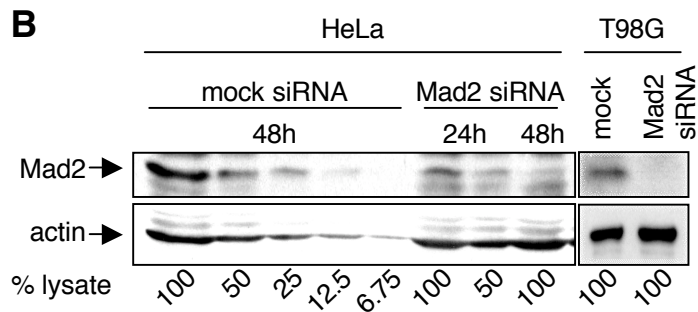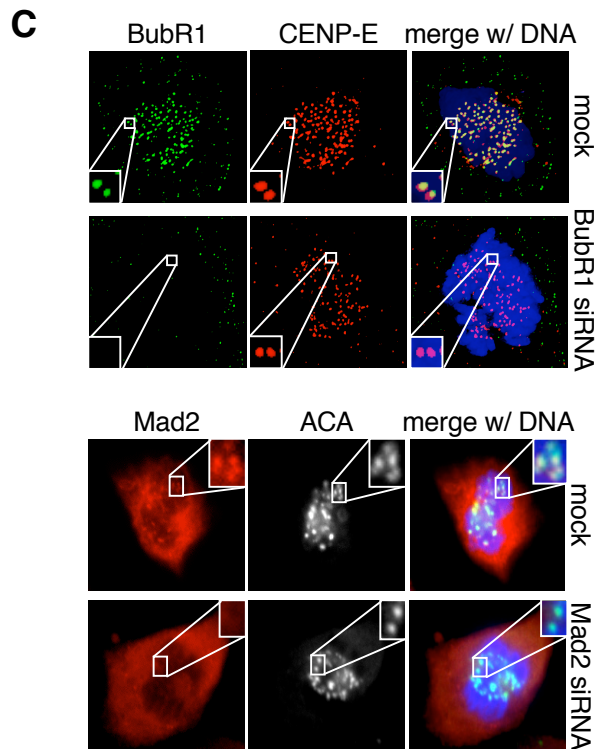

Supplement: pnas_101_23_8699__1.pdf [file pnas_101_23_8699__1.pdf]

NEB

last frame  
before  
anaphase

anaphase  
onset

decon

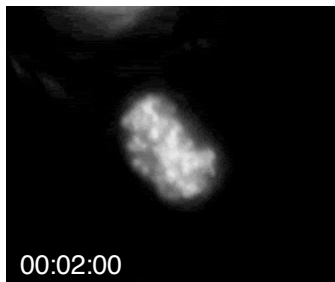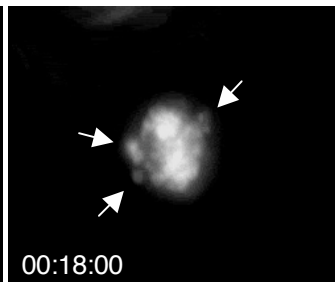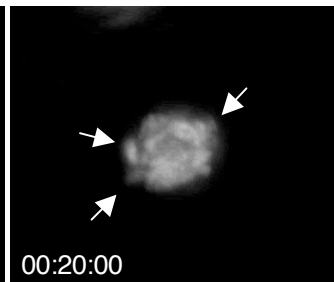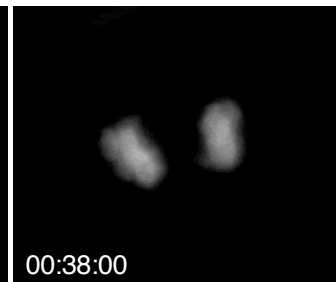

BubR1 siRNA#2

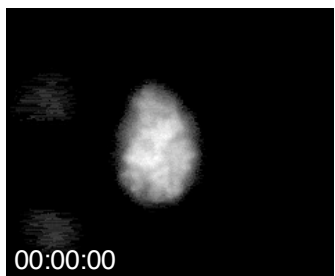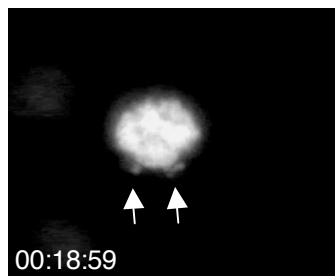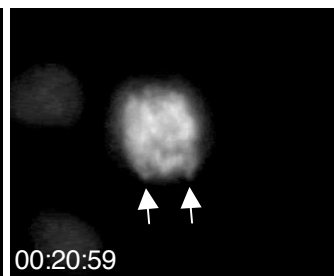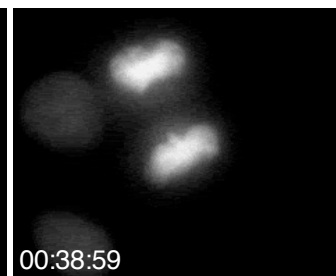

Mad2 siRNA#2

Supplement: pnas_101_23_8699__2.pdf [file pnas_101_23_8699__2.pdf]
